# Supplementary material
Source: PubMed Central journal article supplement (PMC7521913)
Supplement: mmc1.pdf [file mmc1.pdf]

# THE LANCET

## Rheumatology

### Supplementary appendix

This appendix formed part of the original submission and has been peer reviewed.  
We post it as supplied by the authors.

Supplement to: Vlaar APJ, de Bruin S, Busch M, et al. Anti-C5a antibody IFX-1 (vilobelimab) treatment versus best supportive care for patients with severe COVID-19 (PANAMO): an exploratory, open-label, phase 2 randomised controlled trial. *Lancet Rheumatol* 2020; published online Sept 28. [https://doi.org/10.1016/S2665-9913\(20\)30341-6](https://doi.org/10.1016/S2665-9913(20)30341-6).

## CONTENT APPENDIX

1. **Figure 1.** Shift Plots for Estimated Glomerular Filtration Rates and Lymphocytes Concentrations and LS Mean Plots for relative changes in selected outcome parameters in intubated patients at baseline or same day. (Page 1)
2. **Figure 2.** Proposed Role of C5a in COVID-19-induced Vascular Disease (Page 2)
3. **Figure 3.** Kaplan-Meier Curves for 28-day All-cause Mortality. (Page 3)
4. **Table 1:** Symptoms (Page 5)
5. **Table 2:** Demographic and Clinical Characteristics at Baseline stratified by site. (Page 6)
6. **Table 3:** Comparison of model based analysis results without and with adjusting for relevant comorbidities (relative and absolute change from baseline). (Page 7)
7. **Table 4:** Summary of all adverse events by treatment arm and MedDRA System Organ Class and Preferred Term. (Page 9)
8. **Consort checklist** (Page 13)

■ Kidney failure   
 ■ Moderately to severely decreased   
 ■ Mildly decreased   
 ■ Normal or high  
■ Severely decreased   
 ■ Mildly to moderately decreased   
 ■ Normal or high

A

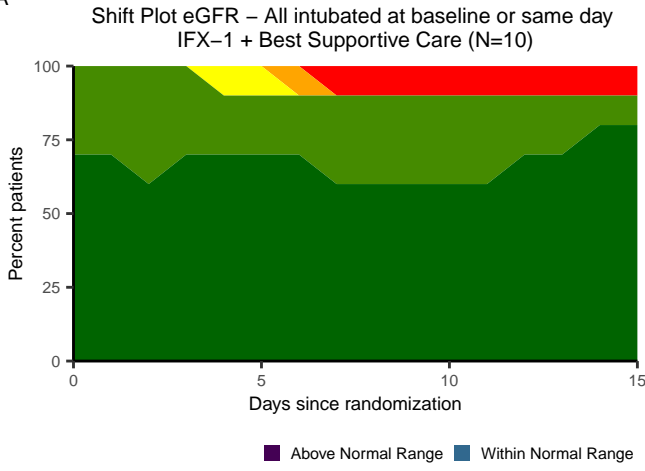

B

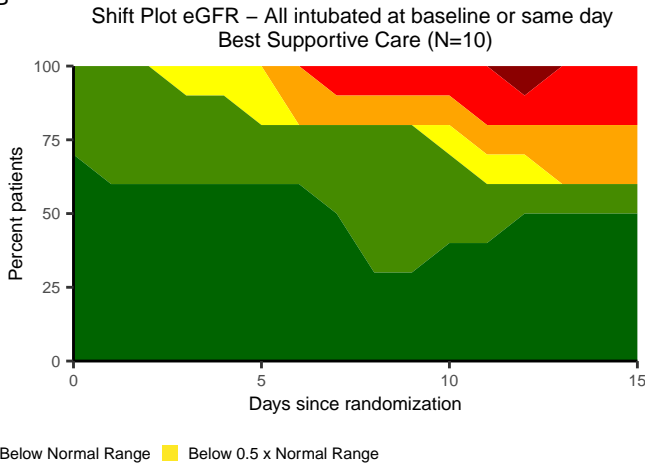

C

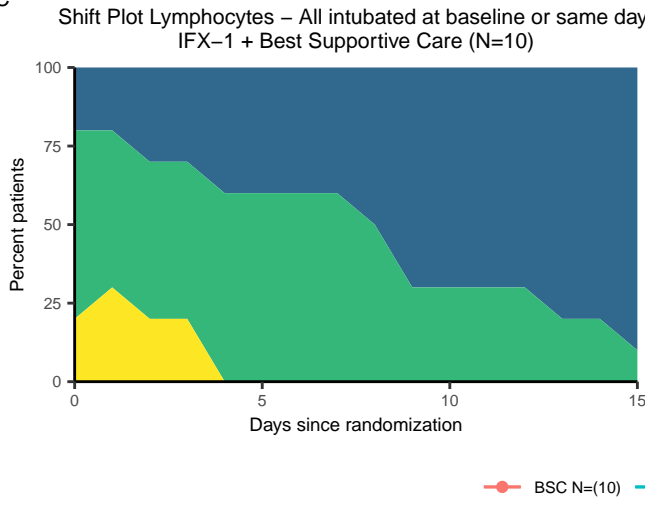

D

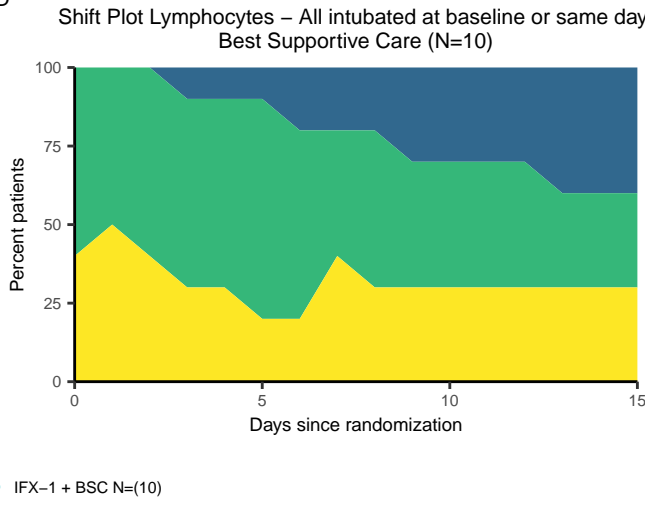

● BSC N=(10)   
 ● IFX-1 + BSC N=(10)

E

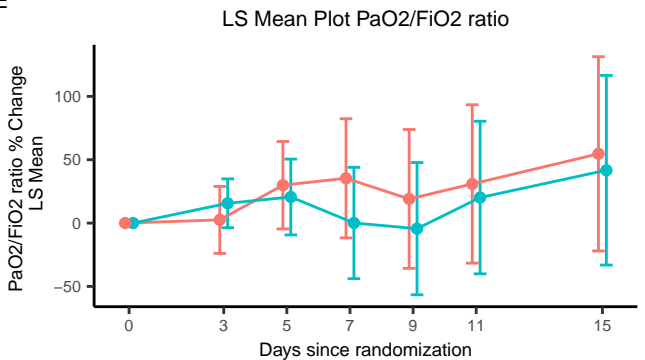

F

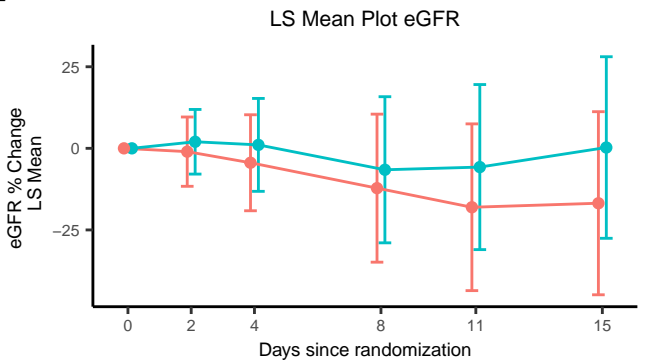

G

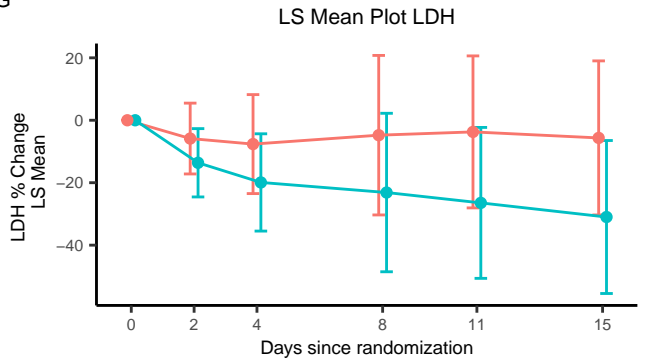

H

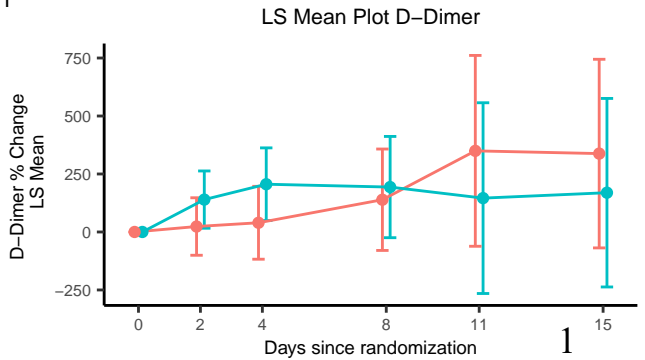

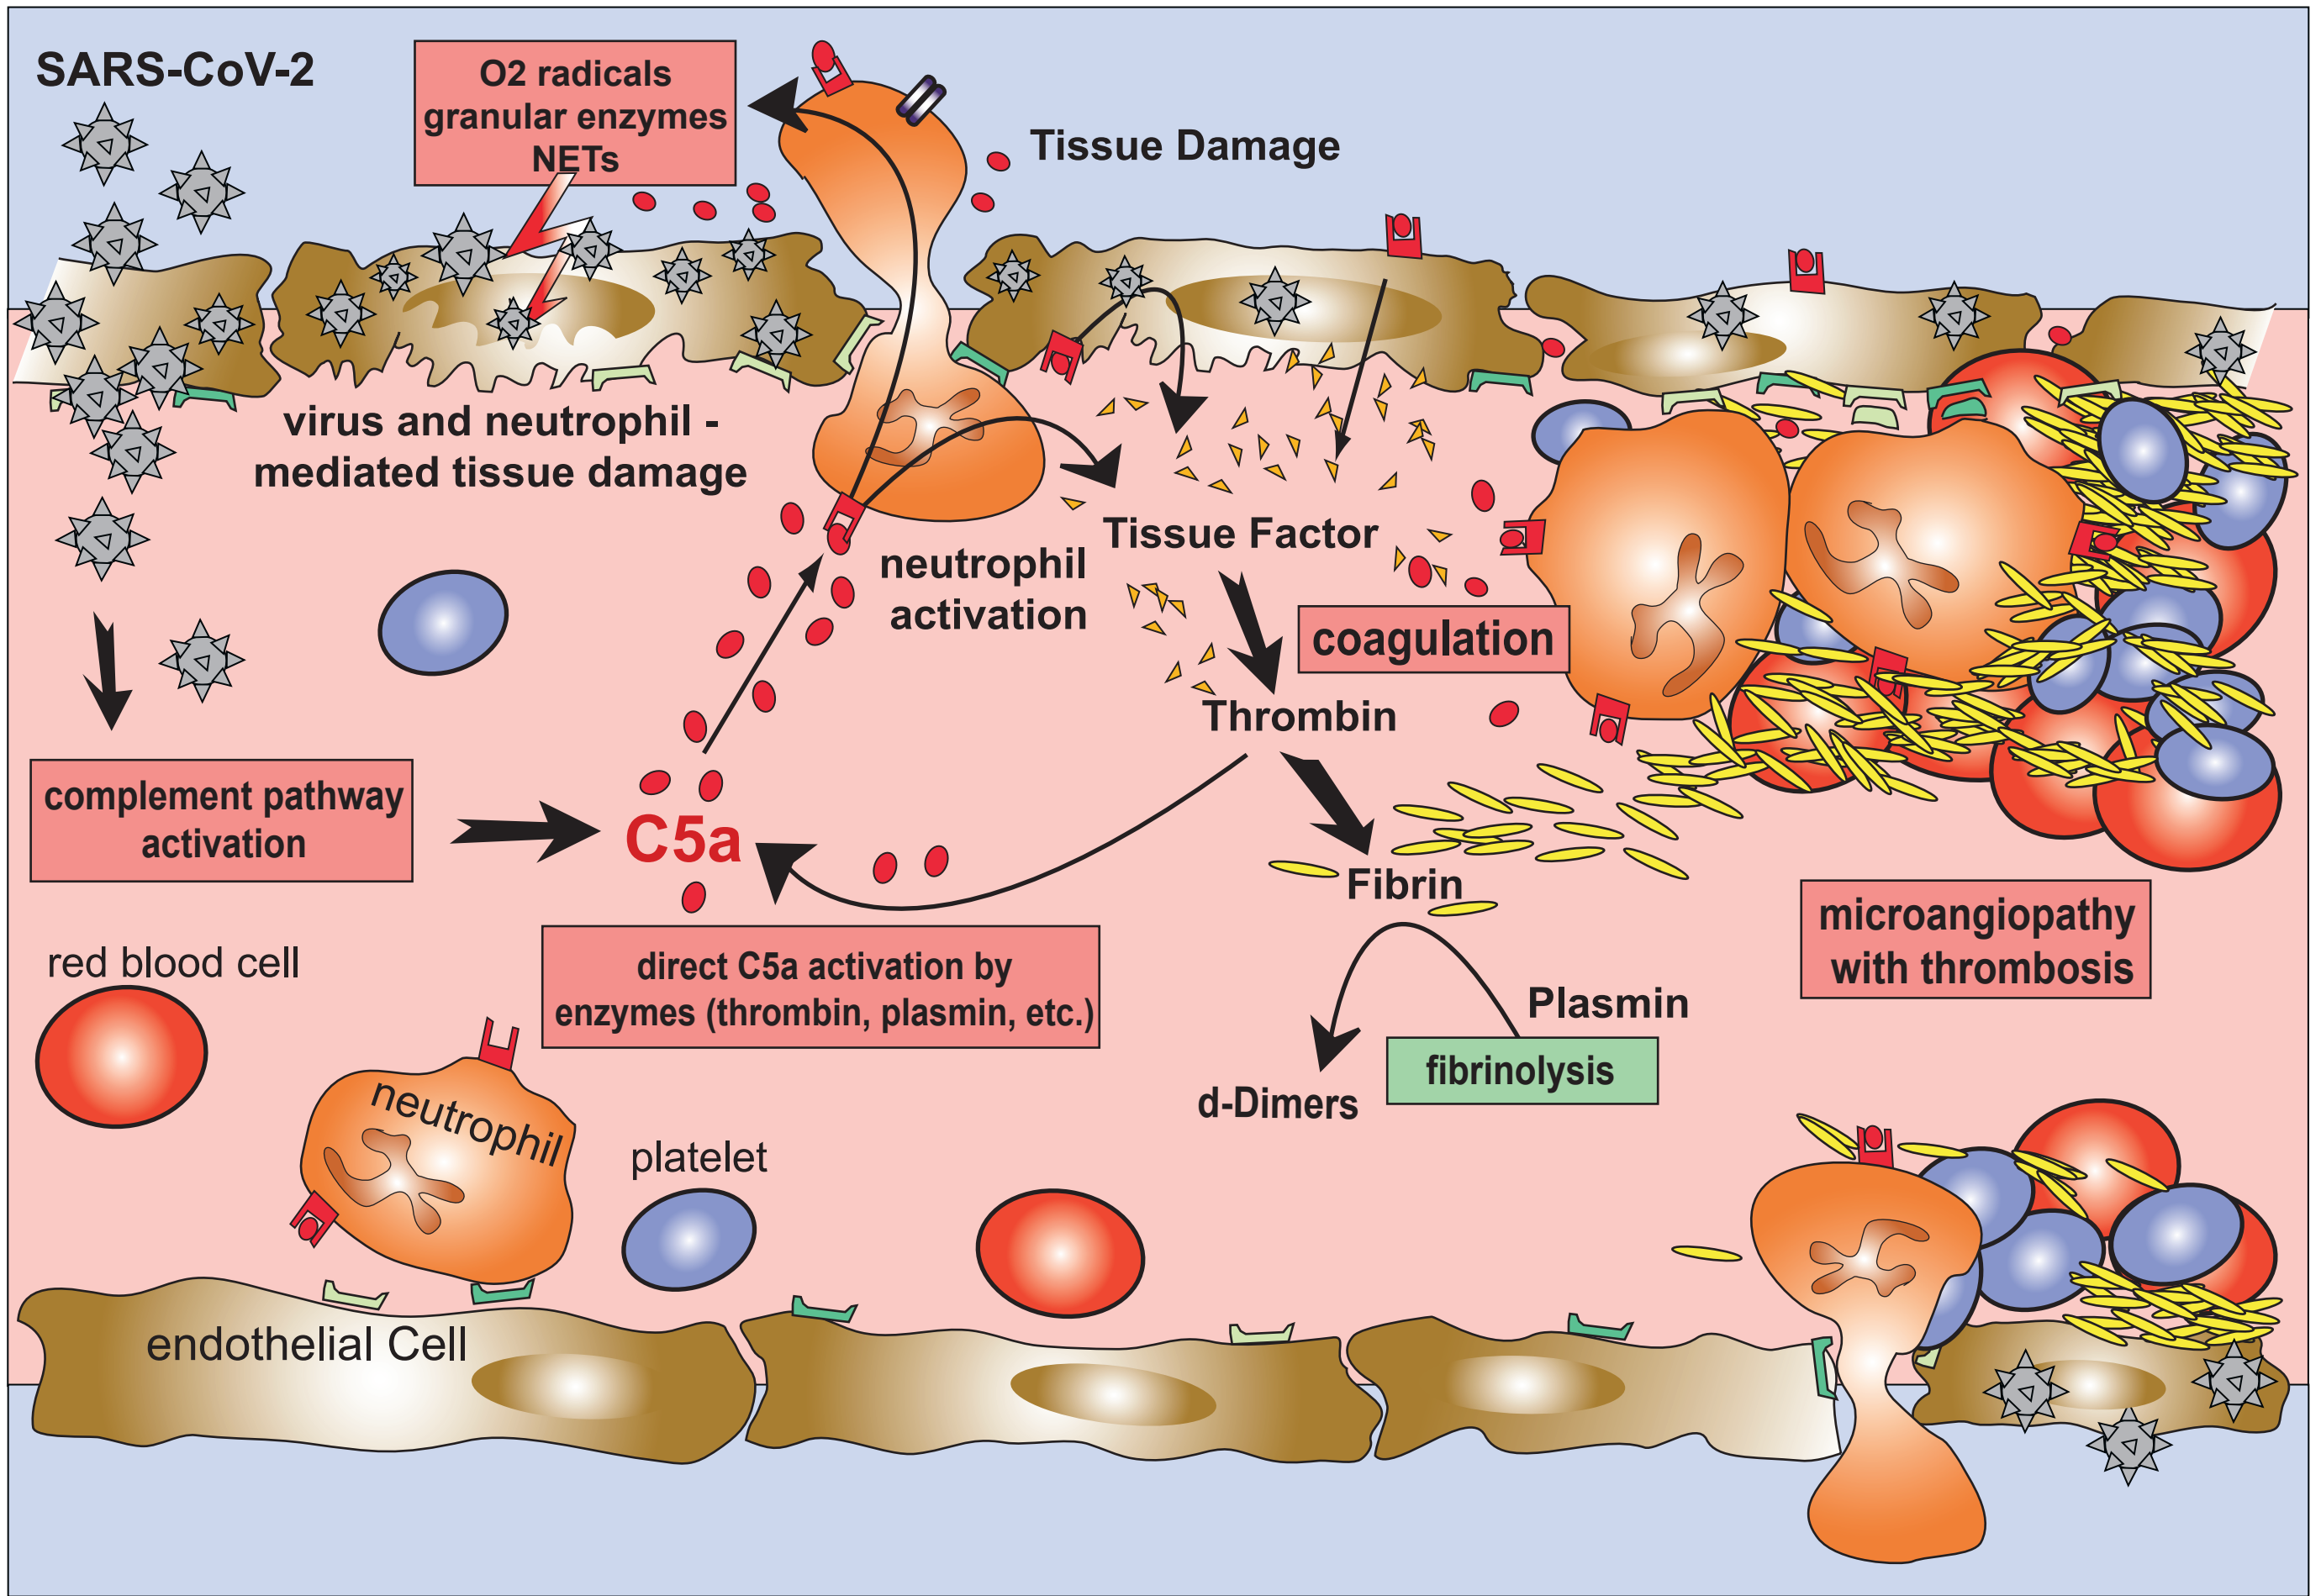

**A All cause mortality  
(All randomized)**

—+ BSC —+ IFX-1 + BSC

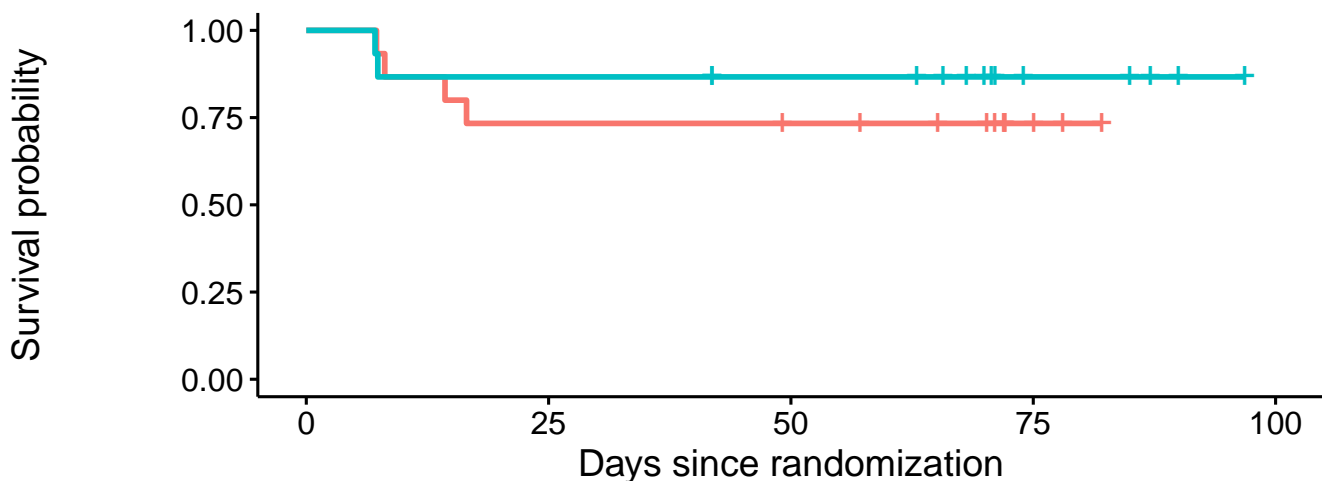

Number at risk (number censored)

|             |        |             |
|-------------|--------|-------------|
|             | BSC    | IFX-1 + BSC |
| BSC         | 15 (0) | 11 (0)      |
| IFX-1 + BSC | 15 (0) | 13 (0)      |
|             | 25     | 50          |
| BSC         | 10 (1) | 3 (8)       |
| IFX-1 + BSC | 11 (2) | 4 (9)       |
|             | 75     | 100         |
| BSC         | 0 (11) | 0 (13)      |
| IFX-1 + BSC | 0 (13) | 0 (13)      |

**B All cause mortality  
(All intubated at baseline or same day)**

—+ BSC —+ IFX-1 + BSC

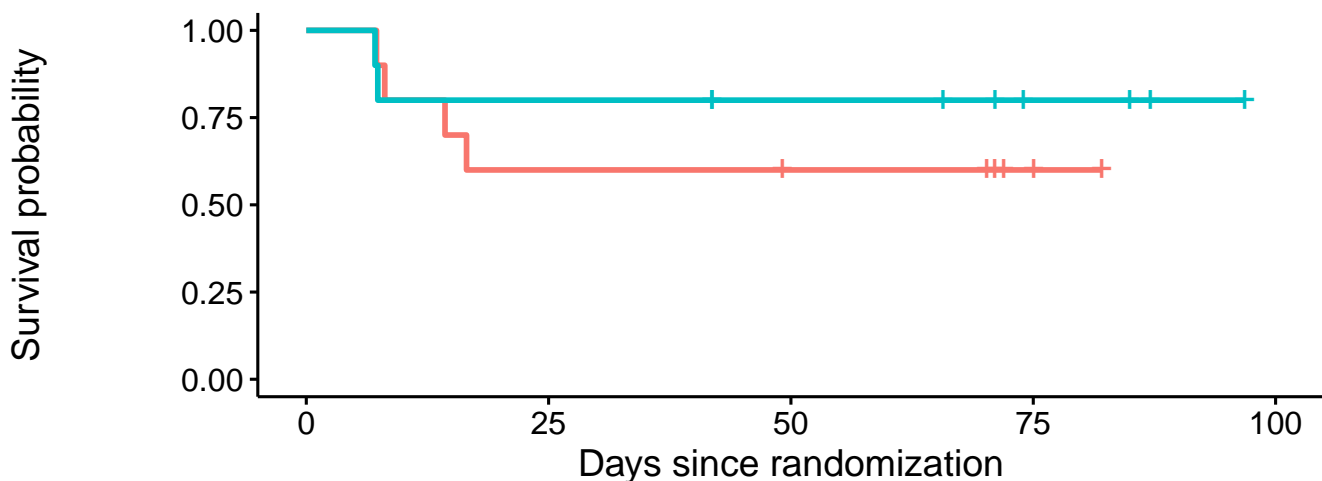

Number at risk (number censored)

|             |        |             |
|-------------|--------|-------------|
|             | BSC    | IFX-1 + BSC |
| BSC         | 10 (0) | 6 (0)       |
| IFX-1 + BSC | 10 (0) | 8 (0)       |
|             | 25     | 50          |
| BSC         | 5 (1)  | 2 (4)       |
| IFX-1 + BSC | 6 (2)  | 3 (5)       |
|             | 75     | 100         |
| BSC         | 0 (6)  | 0 (8)       |
| IFX-1 + BSC | 0 (8)  | 0 (8)       |

## Legends supplementary files

**Figure 1.** Shift Plots for Estimated Glomerular Filtration Rates and Lymphocytes Concentrations and LS Mean Plots for relative changes in selected outcome parameters in intubated patients at baseline or same day.

Legend: Categories of eGFR (%) in the IFX-1 treated group (panel A) and best standard care group (B), and categories of lymphocyte counts in the IFX-1 treated group (panel C) and best standard care group (D). Plotted relative change in mean PaO<sub>2</sub>/FiO<sub>2</sub> ratio and 95% confidence interval for the mean (panel E), eGFR (panel F), LDH (Panel G) and D-Dimers (Panel H). LRMM=Linear repeated measures model

## Figure 2. Proposed Role of C5a in COVID-19-induced Vascular Disease

Endothelial damage is induced by SARS-CoV-2 infection which also activates the complement system leading to C5a generation. C5a activates neutrophils via C5aR leading to increased adherence to endothelial cells and damage through generation of oxidative radicals, granular enzyme release and neutrophil extracellular traps (NETs). C5a induces release of tissue factor from neutrophils as well as endothelial cells, which promotes coagulation leading to Fibrin formation. Thrombin, plasmin and other enzymes can further induce direct C5a activation (through direct cleavage of C5) which may establish a vicious cycle leading to microangiopathy with thrombosis.

## Figure 3. Kaplan-Meier Curves for 28-day All-cause Mortality.

Kaplan-Meier estimates of mortality by 28 days were 13% (95% CI, 0% to 31%) for IFX-1 and 27% (95% CI, 4% to 49%) for controls (Figure 3A; adjusted hazard ratio for death, 0.65; 95% CI, 0.10 to 4.14). For those intubated within six hours after randomization, estimates of mortality by 28 days were 20% (95% CI, 0% to 45%) for IFX-1 and 40% (95% CI, 10% to 70%) for the best supportive care group (hazard ratio for death, 0.48; 95% CI, 0.07 to 3.35).

**Supplemental table 1: Symptoms**

| Symptom               | Total  |         | IFX-1 + BSC |         | BSC    |         |
|-----------------------|--------|---------|-------------|---------|--------|---------|
|                       | (N=30) |         | (N=15)      |         | (N=15) |         |
| Dyspnoea              | 28     | (93.3%) | 14          | (93.3%) | 14     | (93.3%) |
| Cough                 | 21     | (70.0%) | 10          | (66.7%) | 11     | (73.3%) |
| Pyrexia               | 11     | (36.7%) | 5           | (33.3%) | 6      | (40.0%) |
| Fatigue               | 4      | (13.3%) | 1           | (6.7%)  | 3      | (20.0%) |
| Malaise               | 4      | (13.3%) | 3           | (20.0%) | 1      | (6.7%)  |
| Decreased appetite    | 3      | (10.0%) | 1           | (6.7%)  | 2      | (13.3%) |
| Headache              | 3      | (10.0%) | 1           | (6.7%)  | 2      | (13.3%) |
| Nausea                | 3      | (10.0%) | 1           | (6.7%)  | 2      | (13.3%) |
| Ageusia               | 2      | (6.7%)  | 1           | (6.7%)  | 1      | (6.7%)  |
| Chest pain            | 2      | (6.7%)  | 1           | (6.7%)  | 1      | (6.7%)  |
| Diarrhoea             | 2      | (6.7%)  | 1           | (6.7%)  | 1      | (6.7%)  |
| Hypoxia               | 2      | (6.7%)  | 2           | (13.3%) | 0      | (0.0%)  |
| Anosmia               | 1      | (3.3%)  | 0           | (0.0%)  | 1      | (6.7%)  |
| Back pain             | 1      | (3.3%)  | 1           | (6.7%)  | 0      | (0.0%)  |
| Constipation          | 1      | (3.3%)  | 0           | (0.0%)  | 1      | (6.7%)  |
| Delirium              | 1      | (3.3%)  | 0           | (0.0%)  | 1      | (6.7%)  |
| Dysgeusia             | 1      | (3.3%)  | 0           | (0.0%)  | 1      | (6.7%)  |
| Dyspnoea at rest      | 1      | (3.3%)  | 0           | (0.0%)  | 1      | (6.7%)  |
| Dyspnoea exertional   | 1      | (3.3%)  | 0           | (0.0%)  | 1      | (6.7%)  |
| Fall                  | 1      | (3.3%)  | 0           | (0.0%)  | 1      | (6.7%)  |
| Hypertension          | 1      | (3.3%)  | 0           | (0.0%)  | 1      | (6.7%)  |
| Hyponatraemia         | 1      | (3.3%)  | 0           | (0.0%)  | 1      | (6.7%)  |
| Myalgia               | 1      | (3.3%)  | 1           | (6.7%)  | 0      | (0.0%)  |
| Neck pain             | 1      | (3.3%)  | 1           | (6.7%)  | 0      | (0.0%)  |
| Oropharyngeal pain    | 1      | (3.3%)  | 1           | (6.7%)  | 0      | (0.0%)  |
| Painful respiration   | 1      | (3.3%)  | 0           | (0.0%)  | 1      | (6.7%)  |
| Pulmonary haemorrhage | 1      | (3.3%)  | 0           | (0.0%)  | 1      | (6.7%)  |
| Taste disorder        | 1      | (3.3%)  | 1           | (6.7%)  | 0      | (0.0%)  |
| Vomiting              | 1      | (3.3%)  | 0           | (0.0%)  | 1      | (6.7%)  |

**Supplemental table 2:** Demographic and Clinical Characteristics at Baseline stratified by site.

| Characteristic                                                    | Site 1<br>(N=17) | Site 2<br>(N=12) | Site 3<br>(N=1) |
|-------------------------------------------------------------------|------------------|------------------|-----------------|
| Randomized to IFX-1                                               | 8 (47)           | 7 (58)           | 0 (0)           |
| Age - yr – mean±SD                                                | 60±9             | 60±8             | 70              |
| Male sex – no. (%)                                                | 11 (65)          | 10 (83)          | 1 (100)         |
| Race – no. (%)                                                    |                  |                  |                 |
| White                                                             | 7 (41)           | 11 (92)          | 1 (100)         |
| Asian                                                             | 5 (29)           | 1 (8)            | 0 (0)           |
| Black                                                             | 4 (24)           | 0 (0)            | 0 (0)           |
| Median time (IQR) from symptom onset to randomization – days      | 12 (8-13)        | 10 (9-14)        | 8               |
| Median time (IQR) from COVID-19 diagnosis to randomization (days) | 4 (1-4)          | 2 (0-3)          | 1               |
| No. of risk-relevant coexisting conditions* – no. total no. (%)   |                  |                  |                 |
| None                                                              | 5 (29)           | 5 (42)           | 0 (0)           |
| One                                                               | 9 (53)           | 5 (42)           | 1 (100)         |
| Two or more                                                       | 3 (18)           | 2 (17)           | 0 (0)           |
| Selected coexisting conditions – no./total no. (%)                |                  |                  |                 |
| Hypertension                                                      | 6 (35)           | 3 (25)           | 0 (0)           |
| Diabetes                                                          | 6 (35)           | 1 (8)            | 1 (100)         |
| Obesity                                                           | 6 (35)           | 0 (0)            | 0 (0)           |
| Intubated at randomization – no. (%)                              | 14 (82)          | 3 (25)           | 1 (100)         |
| Oxygen mask – no. (%)                                             | 2 (12)           | 6 (50)           | 0 (0)           |
| Nasal cannula – no. (%)                                           | 1 (6)            | 3 (25)           | 0 (0)           |
| Admission department at randomization – no. (%)                   |                  |                  |                 |
| Intensive care unit                                               | 14 (82)          | 3 (25)           | 1 (100)         |
| Intermediate care unit                                            | 2 (12)           | 5 (42)           | 0 (0)           |
| COVID ward                                                        | 1 (6)            | 4 (33)           | 0 (0)           |



**Supplemental table 3:** Comparison of model based analysis results without and with adjusting for relevant comorbidities (relative and absolute change from baseline).

| Result                                                                             | Adjustment according to protocol | Adjustment according to protocol + relevant comorbidities |
|------------------------------------------------------------------------------------|----------------------------------|-----------------------------------------------------------|
| Hazard ratio for all cause mortality                                               | 0.651 (0.103; 4.135)             | 0.584 (0.071; 4.789)                                      |
| LS Means Difference for relative Change OI (all value irrespective of position)    |                                  |                                                           |
| At day 5                                                                           | -24.4 (-58.0; 9.3)               | -26.2 (-60.6; 8.2)                                        |
| At day 15                                                                          | -14.5 (-102.5; 73.6)             | -16.3 (-104.3; 71.7)                                      |
| % Change LS Means Difference for eGFR                                              |                                  |                                                           |
| At day 4                                                                           | 8.6 (-5.4; 22.5)                 | 6.8 (-7.6; 21.2)                                          |
| At day 15                                                                          | 17.3 (-8.2; 42.9)                | 15.6 (-9.8; 40.9)                                         |
| % Change LS Means Difference for LDH                                               |                                  |                                                           |
| At day 4                                                                           | -11.1 (-26.2; 4.1)               | -11.0 (-26.3; 4.3)                                        |
| At day 15                                                                          | -21.8 (-45.7; 2.0)               | -21.7 (-45.7; 2.2)                                        |
| % Change LS Means Difference for D-Dimer                                           |                                  |                                                           |
| At day 4                                                                           | 213.8 (24.1; 403.5)              | 200.3 (2.6; 397.9)                                        |
| At day 15                                                                          | -26.7 (-420.6; 367.2)            | -40.3 (-442.1; 361.6)                                     |
| % Change LS Means Difference for Lymphocytes                                       |                                  |                                                           |
| At day 4                                                                           | 28.8 (-2.3; 59.9)                | 29.1 (-2.3; 60.4)                                         |
| At day 15                                                                          | 49.5 (-28.6; 127.6)              | 49.8 (-28.5; 128.0)                                       |
| LS Means Difference for abs. change OI (all value irrespective of position) [mmHg] |                                  |                                                           |
| At day 5                                                                           | -41.6 (-91.3; 8.1)               | -43.6 (-94.5; 7.3)                                        |
| At day 15                                                                          | -5.2 (-119.3; 108.9)             | -7.2 (-121.7; 107.3)                                      |
| Abs. Change LS Means Difference for eGFR [mL/min per 1.73m <sup>2</sup> ]          |                                  |                                                           |
| At day 4                                                                           | 6.2 (-5.3; 17.8)                 | 4.6 (-7.4; 16.7)                                          |
| At day 15                                                                          | 15.7 (-6.1; 37.5)                | 14.1 (-7.5; 35.7)                                         |
| Abs. Change LS Means Difference for LDH [U/L]                                      |                                  |                                                           |
| At day 4                                                                           | -58.3 (-124.9; 8.3)              | -58.5 (-125.8; 8.9)                                       |

|                                             |                      |                      |
|---------------------------------------------|----------------------|----------------------|
| At day 15                                   | -101.3 (-212.0; 9.4) | -101.5 (-212.6; 9.7) |
| Abs. Change LS Means Difference for D-Dimer |                      |                      |
| [mg/L]                                      |                      |                      |
| At day 4                                    | 0.8 (-4.3; 5.9)      | 0.5 (-4.5;5.6)       |
| At day 15                                   | -3.2 (-7.7; 1.3)     | -3.5 (-8.1;1.1))     |
| Abs. Change LS Means Difference for         |                      |                      |
| Lymphocytes [10 <sup>9</sup> /L]            |                      |                      |
| At day 4                                    | 0.2 (0; 0.5)         | 0.2 (0;0.5)          |
| At day 15                                   | 0.5 (0.1; 0.9)       | 0.5 (0.1;0.9)        |

---

**Supplemental Table 4:** Summary of all adverse events by treatment arm and MedDRA System Organ Class and Preferred Term.

| MedDRA System Organ Class<br>MedDRA Preferred Term | IFX-1 + BSC<br>(N=15) |           |        | BSC<br>(N=15) |           |        |
|----------------------------------------------------|-----------------------|-----------|--------|---------------|-----------|--------|
|                                                    | Patient<br>n          | Patient % | Events | Patient<br>n  | Patient % | Events |
| Total                                              | 14                    | (93.3%)   | 140    | 14            | (93.3%)   | 126    |
| Metabolism and nutrition disorders                 | 10                    | (66.7%)   | 20     | 11            | (73.3%)   | 24     |
| Hypokalaemia                                       | 5                     | (33.3%)   | 5      | 4             | (26.7%)   | 4      |
| Hypernatraemia                                     | 3                     | (20.0%)   | 3      | 5             | (33.3%)   | 5      |
| Hypophosphataemia                                  | 2                     | (13.3%)   | 3      | 5             | (33.3%)   | 6      |
| Hyperglycaemia                                     | 3                     | (20.0%)   | 3      | 3             | (20.0%)   | 3      |
| Hyponatraemia                                      | 2                     | (13.3%)   | 2      | 1             | (6.7%)    | 1      |
| Hyperkalaemia                                      | 1                     | (6.7%)    | 1      | 1             | (6.7%)    | 1      |
| Fluid overload                                     | 0                     | (0.0%)    | 0      | 1             | (6.7%)    | 1      |
| Hypercalcaemia                                     | 0                     | (0.0%)    | 0      | 1             | (6.7%)    | 1      |
| Hyperchloraemia                                    | 0                     | (0.0%)    | 0      | 1             | (6.7%)    | 1      |
| Hypermagnesaemia                                   | 0                     | (0.0%)    | 0      | 1             | (6.7%)    | 1      |
| Hypomagnesaemia                                    | 1                     | (6.7%)    | 1      | 0             | (0.0%)    | 0      |
| Metabolic alkalosis                                | 1                     | (6.7%)    | 1      | 0             | (0.0%)    | 0      |
| Refeeding syndrome                                 | 1                     | (6.7%)    | 1      | 0             | (0.0%)    | 0      |
| Respiratory, thoracic and mediastinal disorders    | 10                    | (66.7%)   | 16     | 9             | (60.0%)   | 14     |
| Pulmonary embolism                                 | 6                     | (40.0%)   | 6      | 7             | (46.7%)   | 7      |
| Respiratory failure                                | 3                     | (20.0%)   | 3      | 3             | (20.0%)   | 4      |
| Hypoxia                                            | 3                     | (20.0%)   | 3      | 1             | (6.7%)    | 1      |
| Bradypnoea                                         | 1                     | (6.7%)    | 1      | 0             | (0.0%)    | 0      |
| Dyspnoea                                           | 1                     | (6.7%)    | 1      | 0             | (0.0%)    | 0      |
| Hypoventilation                                    | 1                     | (6.7%)    | 2      | 0             | (0.0%)    | 0      |
| Pneumothorax                                       | 0                     | (0.0%)    | 0      | 1             | (6.7%)    | 1      |
| Sleep apnoea syndrome                              | 0                     | (0.0%)    | 0      | 1             | (6.7%)    | 1      |
| Investigations                                     | 10                    | (66.7%)   | 19     | 7             | (46.7%)   | 13     |
| Hepatic enzyme increased                           | 1                     | (6.7%)    | 1      | 3             | (20.0%)   | 3      |
| Blood bicarbonate increased                        | 1                     | (6.7%)    | 1      | 1             | (6.7%)    | 1      |
| Blood potassium decreased                          | 1                     | (6.7%)    | 1      | 1             | (6.7%)    | 1      |
| Electrocardiogram QT prolonged                     | 1                     | (6.7%)    | 1      | 1             | (6.7%)    | 1      |
| Fluid balance positive                             | 0                     | (0.0%)    | 0      | 2             | (13.3%)   | 2      |
| Oxygen saturation decreased                        | 2                     | (13.3%)   | 2      | 0             | (0.0%)    | 0      |
| Staphylococcus test positive                       | 1                     | (6.7%)    | 1      | 1             | (6.7%)    | 1      |
| Blood alkaline phosphatase increased               | 1                     | (6.7%)    | 1      | 0             | (0.0%)    | 0      |
| Blood culture positive                             | 1                     | (6.7%)    | 1      | 0             | (0.0%)    | 0      |
| Blood fibrinogen increased                         | 0                     | (0.0%)    | 0      | 1             | (6.7%)    | 1      |
| Blood phosphorus decreased                         | 0                     | (0.0%)    | 0      | 1             | (6.7%)    | 1      |
| Culture negative                                   | 0                     | (0.0%)    | 0      | 1             | (6.7%)    | 1      |
| Culture urine                                      | 1                     | (6.7%)    | 1      | 0             | (0.0%)    | 0      |
| Cytomegalovirus test positive                      | 1                     | (6.7%)    | 1      | 0             | (0.0%)    | 0      |

| MedDRA System Organ Class<br>MedDRA Preferred Term | IFX-1 + BSC<br>(N=15) |                |           | BSC<br>(N=15) |                |           |
|----------------------------------------------------|-----------------------|----------------|-----------|---------------|----------------|-----------|
|                                                    | Patient<br>n          | Patient %      | Events    | Patient<br>n  | Patient %      | Events    |
| End-tidal CO2 increased                            | 1                     | (6.7%)         | 1         | 0             | (0.0%)         | 0         |
| Enterococcus test positive                         | 1                     | (6.7%)         | 1         | 0             | (0.0%)         | 0         |
| Eosinophil count increased                         | 1                     | (6.7%)         | 1         | 0             | (0.0%)         | 0         |
| Fibrin D dimer increased                           | 0                     | (0.0%)         | 0         | 1             | (6.7%)         | 1         |
| Gamma-glutamyltransferase increased                | 1                     | (6.7%)         | 1         | 0             | (0.0%)         | 0         |
| Liver function test abnormal                       | 1                     | (6.7%)         | 1         | 0             | (0.0%)         | 0         |
| Platelet count increased                           | 1                     | (6.7%)         | 1         | 0             | (0.0%)         | 0         |
| Protein urine present                              | 1                     | (6.7%)         | 1         | 0             | (0.0%)         | 0         |
| Sputum culture positive                            | 1                     | (6.7%)         | 1         | 0             | (0.0%)         | 0         |
| <b>Gastrointestinal disorders</b>                  | <b>5</b>              | <b>(33.3%)</b> | <b>11</b> | <b>10</b>     | <b>(66.7%)</b> | <b>19</b> |
| Impaired gastric emptying                          | 4                     | (26.7%)        | 4         | 7             | (46.7%)        | 7         |
| Constipation                                       | 2                     | (13.3%)        | 2         | 4             | (26.7%)        | 4         |
| Diarrhoea                                          | 1                     | (6.7%)         | 1         | 1             | (6.7%)         | 1         |
| Dysphagia                                          | 1                     | (6.7%)         | 1         | 1             | (6.7%)         | 1         |
| Frequent bowel movements                           | 1                     | (6.7%)         | 1         | 0             | (0.0%)         | 0         |
| Gastric haemorrhage                                | 0                     | (0.0%)         | 0         | 1             | (6.7%)         | 1         |
| Ileus                                              | 0                     | (0.0%)         | 0         | 1             | (6.7%)         | 1         |
| Ileus paralytic                                    | 0                     | (0.0%)         | 0         | 1             | (6.7%)         | 1         |
| Mouth ulceration                                   | 1                     | (6.7%)         | 1         | 0             | (0.0%)         | 0         |
| Nausea                                             | 0                     | (0.0%)         | 0         | 1             | (6.7%)         | 1         |
| Rectal haemorrhage                                 | 0                     | (0.0%)         | 0         | 1             | (6.7%)         | 1         |
| Salivary hypersecretion                            | 1                     | (6.7%)         | 1         | 0             | (0.0%)         | 0         |
| Vomiting                                           | 0                     | (0.0%)         | 0         | 1             | (6.7%)         | 1         |
| <b>Infections and infestations</b>                 | <b>9</b>              | <b>(60.0%)</b> | <b>12</b> | <b>6</b>      | <b>(40.0%)</b> | <b>7</b>  |
| Pneumonia                                          | 2                     | (13.3%)        | 2         | 5             | (33.3%)        | 5         |
| Staphylococcal infection                           | 2                     | (13.3%)        | 2         | 0             | (0.0%)         | 0         |
| Aspergillus infection                              | 1                     | (6.7%)         | 1         | 0             | (0.0%)         | 0         |
| Bronchopulmonary aspergillosis                     | 1                     | (6.7%)         | 1         | 0             | (0.0%)         | 0         |
| Cellulitis                                         | 0                     | (0.0%)         | 0         | 1             | (6.7%)         | 1         |
| Device related sepsis                              | 1                     | (6.7%)         | 1         | 0             | (0.0%)         | 0         |
| Enterococcal infection                             | 1                     | (6.7%)         | 1         | 0             | (0.0%)         | 0         |
| Fungal infection                                   | 1                     | (6.7%)         | 1         | 0             | (0.0%)         | 0         |
| Pseudomonas infection                              | 1                     | (6.7%)         | 1         | 0             | (0.0%)         | 0         |
| Sepsis                                             | 0                     | (0.0%)         | 0         | 1             | (6.7%)         | 1         |
| Urinary tract infection                            | 1                     | (6.7%)         | 1         | 0             | (0.0%)         | 0         |
| Vascular device infection                          | 1                     | (6.7%)         | 1         | 0             | (0.0%)         | 0         |
| <b>Vascular disorders</b>                          | <b>10</b>             | <b>(66.7%)</b> | <b>13</b> | <b>5</b>      | <b>(33.3%)</b> | <b>6</b>  |
| Deep vein thrombosis                               | 3                     | (20.0%)        | 3         | 3             | (20.0%)        | 3         |
| Hypertension                                       | 2                     | (13.3%)        | 2         | 2             | (13.3%)        | 2         |
| Phlebitis                                          | 1                     | (6.7%)         | 1         | 1             | (6.7%)         | 1         |
| Thrombophlebitis                                   | 2                     | (13.3%)        | 2         | 0             | (0.0%)         | 0         |
| Hypotension                                        | 1                     | (6.7%)         | 1         | 0             | (0.0%)         | 0         |

| MedDRA System Organ Class<br>MedDRA Preferred Term   | IFX-1 + BSC<br>(N=15) |           |        | BSC<br>(N=15) |           |        |
|------------------------------------------------------|-----------------------|-----------|--------|---------------|-----------|--------|
|                                                      | Patient<br>n          | Patient % | Events | Patient<br>n  | Patient % | Events |
| Jugular vein thrombosis                              | 1                     | (6.7%)    | 1      | 0             | (0.0%)    | 0      |
| Peripheral artery thrombosis                         | 1                     | (6.7%)    | 1      | 0             | (0.0%)    | 0      |
| Shock                                                | 1                     | (6.7%)    | 1      | 0             | (0.0%)    | 0      |
| Systolic hypertension                                | 1                     | (6.7%)    | 1      | 0             | (0.0%)    | 0      |
| General disorders and administration site conditions | 5                     | (33.3%)   | 10     | 9             | (60.0%)   | 13     |
| Multiple organ dysfunction syndrome                  | 0                     | (0.0%)    | 0      | 4             | (26.7%)   | 4      |
| Oedema peripheral                                    | 0                     | (0.0%)    | 0      | 4             | (26.7%)   | 4      |
| Pyrexia                                              | 3                     | (20.0%)   | 4      | 1             | (6.7%)    | 1      |
| Catheter site extravasation                          | 1                     | (6.7%)    | 1      | 0             | (0.0%)    | 0      |
| Chest discomfort                                     | 0                     | (0.0%)    | 0      | 1             | (6.7%)    | 1      |
| Chills                                               | 0                     | (0.0%)    | 0      | 1             | (6.7%)    | 1      |
| Face oedema                                          | 0                     | (0.0%)    | 0      | 1             | (6.7%)    | 1      |
| Hypothermia                                          | 0                     | (0.0%)    | 0      | 1             | (6.7%)    | 1      |
| Infusion site discolouration                         | 1                     | (6.7%)    | 1      | 0             | (0.0%)    | 0      |
| Infusion site extravasation                          | 1                     | (6.7%)    | 1      | 0             | (0.0%)    | 0      |
| Infusion site vesicles                               | 1                     | (6.7%)    | 1      | 0             | (0.0%)    | 0      |
| Medical device site haemorrhage                      | 1                     | (6.7%)    | 2      | 0             | (0.0%)    | 0      |
| Psychiatric disorders                                | 7                     | (46.7%)   | 8      | 4             | (26.7%)   | 4      |
| Delirium                                             | 5                     | (33.3%)   | 6      | 3             | (20.0%)   | 3      |
| Anxiety                                              | 0                     | (0.0%)    | 0      | 1             | (6.7%)    | 1      |
| Hallucination                                        | 1                     | (6.7%)    | 1      | 0             | (0.0%)    | 0      |
| Nightmare                                            | 1                     | (6.7%)    | 1      | 0             | (0.0%)    | 0      |
| Skin and subcutaneous tissue disorders               | 4                     | (26.7%)   | 6      | 7             | (46.7%)   | 7      |
| Decubitus ulcer                                      | 2                     | (13.3%)   | 3      | 5             | (33.3%)   | 5      |
| Actinic keratosis                                    | 0                     | (0.0%)    | 0      | 1             | (6.7%)    | 1      |
| Alopecia                                             | 0                     | (0.0%)    | 0      | 1             | (6.7%)    | 1      |
| Angioedema                                           | 1                     | (6.7%)    | 1      | 0             | (0.0%)    | 0      |
| Urticaria                                            | 1                     | (6.7%)    | 2      | 0             | (0.0%)    | 0      |
| Cardiac disorders                                    | 3                     | (20.0%)   | 3      | 6             | (40.0%)   | 7      |
| Supraventricular tachycardia                         | 1                     | (6.7%)    | 1      | 2             | (13.3%)   | 2      |
| Atrial fibrillation                                  | 1                     | (6.7%)    | 1      | 1             | (6.7%)    | 1      |
| Atrioventricular block second degree                 | 0                     | (0.0%)    | 0      | 1             | (6.7%)    | 1      |
| Cardiac failure                                      | 0                     | (0.0%)    | 0      | 1             | (6.7%)    | 1      |
| Defect conduction intraventricular                   | 0                     | (0.0%)    | 0      | 1             | (6.7%)    | 1      |
| Sinus tachycardia                                    | 1                     | (6.7%)    | 1      | 0             | (0.0%)    | 0      |
| Tachycardia                                          | 0                     | (0.0%)    | 0      | 1             | (6.7%)    | 1      |
| Renal and urinary disorders                          | 5                     | (33.3%)   | 6      | 4             | (26.7%)   | 5      |
| Acute kidney injury                                  | 2                     | (13.3%)   | 2      | 4             | (26.7%)   | 4      |
| Oliguria                                             | 2                     | (13.3%)   | 2      | 0             | (0.0%)    | 0      |
| Glycosuria                                           | 1                     | (6.7%)    | 1      | 0             | (0.0%)    | 0      |
| Renal failure                                        | 0                     | (0.0%)    | 0      | 1             | (6.7%)    | 1      |

| MedDRA System Organ Class<br>MedDRA Preferred Term                     | IFX-1 + BSC<br>(N=15) |           |        | BSC<br>(N=15) |           |        |
|------------------------------------------------------------------------|-----------------------|-----------|--------|---------------|-----------|--------|
|                                                                        | Patient<br>n          | Patient % | Events | Patient<br>n  | Patient % | Events |
| Urinary retention                                                      | 1                     | (6.7%)    | 1      | 0             | (0.0%)    | 0      |
| Nervous system disorders                                               | 6                     | (40.0%)   | 7      | 1             | (6.7%)    | 1      |
| Epilepsy                                                               | 1                     | (6.7%)    | 1      | 0             | (0.0%)    | 0      |
| Headache                                                               | 1                     | (6.7%)    | 1      | 0             | (0.0%)    | 0      |
| Hemiparesis                                                            | 1                     | (6.7%)    | 1      | 0             | (0.0%)    | 0      |
| Hypoaesthesia                                                          | 1                     | (6.7%)    | 1      | 0             | (0.0%)    | 0      |
| Intensive care unit acquired weakness                                  | 1                     | (6.7%)    | 1      | 0             | (0.0%)    | 0      |
| Ischaemic cerebral infarction                                          | 1                     | (6.7%)    | 1      | 0             | (0.0%)    | 0      |
| Peripheral nerve lesion                                                | 0                     | (0.0%)    | 0      | 1             | (6.7%)    | 1      |
| Somnolence                                                             | 1                     | (6.7%)    | 1      | 0             | (0.0%)    | 0      |
| Eye disorders                                                          | 1                     | (6.7%)    | 2      | 3             | (20.0%)   | 3      |
| Ocular hyperaemia                                                      | 1                     | (6.7%)    | 1      | 1             | (6.7%)    | 1      |
| Eye irritation                                                         | 1                     | (6.7%)    | 1      | 0             | (0.0%)    | 0      |
| Miosis                                                                 | 0                     | (0.0%)    | 0      | 1             | (6.7%)    | 1      |
| Pupils unequal                                                         | 0                     | (0.0%)    | 0      | 1             | (6.7%)    | 1      |
| Injury, poisoning and procedural complications                         | 1                     | (6.7%)    | 1      | 2             | (13.3%)   | 2      |
| Infusion related reaction                                              | 1                     | (6.7%)    | 1      | 0             | (0.0%)    | 0      |
| Limb injury                                                            | 0                     | (0.0%)    | 0      | 1             | (6.7%)    | 1      |
| Post procedural haematoma                                              | 0                     | (0.0%)    | 0      | 1             | (6.7%)    | 1      |
| Blood and lymphatic system disorders                                   | 2                     | (13.3%)   | 2      | 0             | (0.0%)    | 0      |
| Anaemia                                                                | 2                     | (13.3%)   | 2      | 0             | (0.0%)    | 0      |
| Musculoskeletal and connective tissue disorders                        | 2                     | (13.3%)   | 2      | 0             | (0.0%)    | 0      |
| Arthralgia                                                             | 1                     | (6.7%)    | 1      | 0             | (0.0%)    | 0      |
| Muscular weakness                                                      | 1                     | (6.7%)    | 1      | 0             | (0.0%)    | 0      |
| Ear and labyrinth disorders                                            | 1                     | (6.7%)    | 1      | 0             | (0.0%)    | 0      |
| Vertigo                                                                | 1                     | (6.7%)    | 1      | 0             | (0.0%)    | 0      |
| Neoplasms benign, malignant and unspecified (incl<br>cysts and polyps) | 0                     | (0.0%)    | 0      | 1             | (6.7%)    | 1      |
| Meningioma                                                             | 0                     | (0.0%)    | 0      | 1             | (6.7%)    | 1      |
| Product issues                                                         | 1                     | (6.7%)    | 1      | 0             | (0.0%)    | 0      |
| Device leakage                                                         | 1                     | (6.7%)    | 1      | 0             | (0.0%)    | 0      |

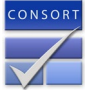

## CONSORT 2010 checklist of information to include when reporting a randomised trial\*

| Section/Topic                    | Item No | Checklist item                                                                                                                                                                              | Reported on page No |
|----------------------------------|---------|---------------------------------------------------------------------------------------------------------------------------------------------------------------------------------------------|---------------------|
| <b>Title and abstract</b>        |         |                                                                                                                                                                                             |                     |
|                                  | 1a      | Identification as a randomised trial in the title                                                                                                                                           | 1,3                 |
|                                  | 1b      | Structured summary of trial design, methods, results, and conclusions (for specific guidance see CONSORT for abstracts)                                                                     | 3                   |
| <b>Introduction</b>              |         |                                                                                                                                                                                             |                     |
| Background and objectives        | 2a      | Scientific background and explanation of rationale                                                                                                                                          | 5                   |
|                                  | 2b      | Specific objectives or hypotheses                                                                                                                                                           | 5                   |
| <b>Methods</b>                   |         |                                                                                                                                                                                             |                     |
| Trial design                     | 3a      | Description of trial design (such as parallel, factorial) including allocation ratio                                                                                                        | 6-9                 |
|                                  | 3b      | Important changes to methods after trial commencement (such as eligibility criteria), with reasons                                                                                          | NA                  |
| Participants                     | 4a      | Eligibility criteria for participants                                                                                                                                                       | 6                   |
|                                  | 4b      | Settings and locations where the data were collected                                                                                                                                        | 8                   |
| Interventions                    | 5       | The interventions for each group with sufficient details to allow replication, including how and when they were actually administered                                                       | 6-9                 |
| Outcomes                         | 6a      | Completely defined pre-specified primary and secondary outcome measures, including how and when they were assessed                                                                          | 8                   |
|                                  | 6b      | Any changes to trial outcomes after the trial commenced, with reasons                                                                                                                       | 8                   |
| Sample size                      | 7a      | How sample size was determined                                                                                                                                                              | 6-9                 |
|                                  | 7b      | When applicable, explanation of any interim analyses and stopping guidelines                                                                                                                | NA                  |
| <b>Randomisation:</b>            |         |                                                                                                                                                                                             |                     |
| Sequence generation              | 8a      | Method used to generate the random allocation sequence                                                                                                                                      | 7                   |
|                                  | 8b      | Type of randomisation; details of any restriction (such as blocking and block size)                                                                                                         | 7                   |
| Allocation concealment mechanism | 9       | Mechanism used to implement the random allocation sequence (such as sequentially numbered containers), describing any steps taken to conceal the sequence until interventions were assigned | 7                   |
| Implementation                   | 10      | Who generated the random allocation sequence, who enrolled participants, and who assigned participants to interventions                                                                     | 7                   |
| Blinding                         | 11a     | If done, who was blinded after assignment to interventions (for example, participants, care providers, those                                                                                | NA                  |

|                                                      |     |                                                                                                                                                   |                      |
|------------------------------------------------------|-----|---------------------------------------------------------------------------------------------------------------------------------------------------|----------------------|
|                                                      |     | assessing outcomes) and how                                                                                                                       |                      |
| Statistical methods                                  | 11b | If relevant, description of the similarity of interventions                                                                                       | NA                   |
|                                                      | 12a | Statistical methods used to compare groups for primary and secondary outcomes                                                                     | 9                    |
|                                                      | 12b | Methods for additional analyses, such as subgroup analyses and adjusted analyses                                                                  | 9                    |
| <b>Results</b>                                       |     |                                                                                                                                                   |                      |
| Participant flow (a diagram is strongly recommended) | 13a | For each group, the numbers of participants who were randomly assigned, received intended treatment, and were analysed for the primary outcome    | 10                   |
|                                                      | 13b | For each group, losses and exclusions after randomisation, together with reasons                                                                  | NA                   |
| Recruitment                                          | 14a | Dates defining the periods of recruitment and follow-up                                                                                           | 10                   |
|                                                      | 14b | Why the trial ended or was stopped                                                                                                                | NA                   |
| Baseline data                                        | 15  | A table showing baseline demographic and clinical characteristics for each group                                                                  | 22 and supplement    |
| Numbers analysed                                     | 16  | For each group, number of participants (denominator) included in each analysis and whether the analysis was by original assigned groups           | figure 1             |
| Outcomes and estimation                              | 17a | For each primary and secondary outcome, results for each group, and the estimated effect size and its precision (such as 95% confidence interval) | 10-13                |
|                                                      | 17b | For binary outcomes, presentation of both absolute and relative effect sizes is recommended                                                       | 10-13                |
| Ancillary analyses                                   | 18  | Results of any other analyses performed, including subgroup analyses and adjusted analyses, distinguishing pre-specified from exploratory         | 10-13 and supplement |
| Harms                                                | 19  | All important harms or unintended effects in each group (for specific guidance see CONSORT for harms)                                             | 10                   |
| <b>Discussion</b>                                    |     |                                                                                                                                                   |                      |
| Limitations                                          | 20  | Trial limitations, addressing sources of potential bias, imprecision, and, if relevant, multiplicity of analyses                                  | 13-16                |
| Generalisability                                     | 21  | Generalisability (external validity, applicability) of the trial findings                                                                         | 13-16                |
| Interpretation                                       | 22  | Interpretation consistent with results, balancing benefits and harms, and considering other relevant evidence                                     | 13-16                |
| <b>Other information</b>                             |     |                                                                                                                                                   |                      |
| Registration                                         | 23  | Registration number and name of trial registry                                                                                                    | 3                    |
| Protocol                                             | 24  | Where the full trial protocol can be accessed, if available                                                                                       | supplement           |
| Funding                                              | 25  | Sources of funding and other support (such as supply of drugs), role of funders                                                                   | 17                   |

\*We strongly recommend reading this statement in conjunction with the CONSORT 2010 Explanation and Elaboration for important clarifications on all the items. If relevant, we also recommend reading CONSORT extensions for cluster randomised trials, non-inferiority and equivalence trials, non-pharmacological treatments, herbal interventions, and pragmatic trials. Additional extensions are forthcoming: for those and for up to date references relevant to this checklist, see [www.consort-statement.org](http://www.consort-statement.org).
